# Supplementary material for: Coupled plasmons in aluminum nanoparticle superclusters
Source: Royal Society of Chemistry journal article supplement (doi:10.1039/d2cp04298c), 2022-01-01
Supplement: d2cp04298c1.pdf [file d2cp04298c1.pdf]

## Supporting Information

### Coupled plasmons in Aluminum nanoparticle superclusters

Mufasila Mumthaz Muhammed<sup>1</sup>, Tahani A. Alrebdi<sup>2</sup>, Ali J. Chamkha<sup>3</sup>, Junais Habeeb Mokkath<sup>4</sup>

[j.mokath@kcst.edu.kw](mailto:j.mokath@kcst.edu.kw)

<sup>1</sup>American International University, Saad Al Abdullah - East of Naseem, Block 3, Kuwait.

<sup>2</sup>Department of Physics, College of Science, Princess Nourah bint Abdulrahman University, P.O. Box 84428, Riyadh 11671, Saudi Arabia.

<sup>3</sup>Faculty of Engineering, Kuwait College of Science and Technology, Doha District, 35004, Kuwait.

<sup>4</sup>Quantum Nanophotonics Simulations Lab, Department of Physics, Kuwait College of Science And Technology, Doha Area, 7th Ring Road, P.O. Box 27235, Kuwait.

Figure S1

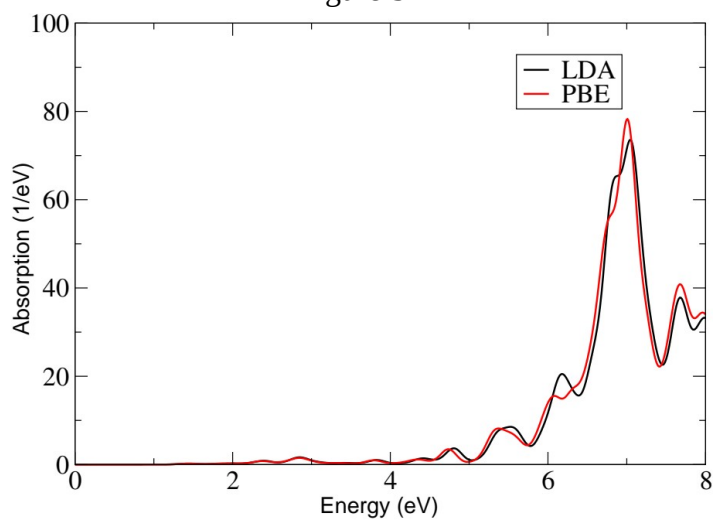

Comparison of the LDA and GGA absorption spectra in the case of single Al nanoparticle

Figure S2

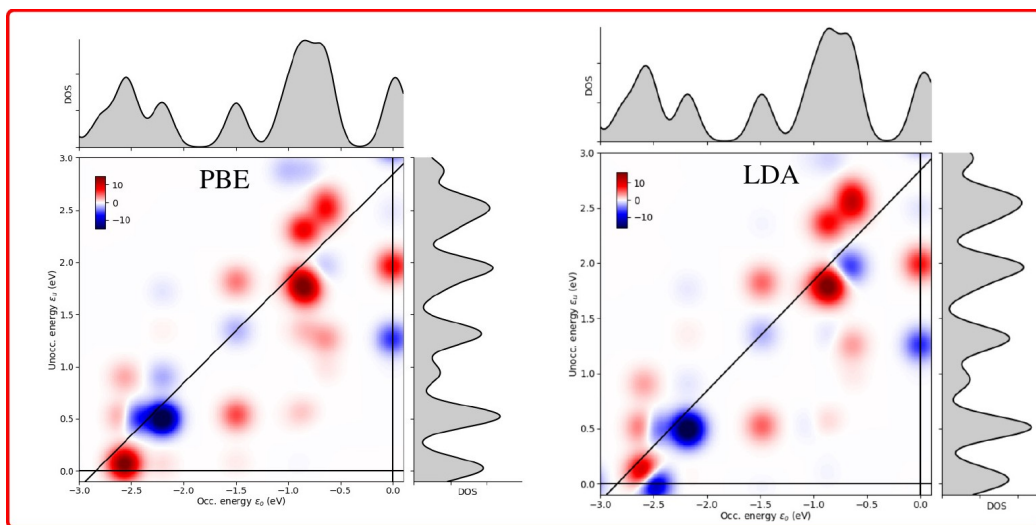

Comparison of TCM plots using GGA and LDA functionals

Figure S3

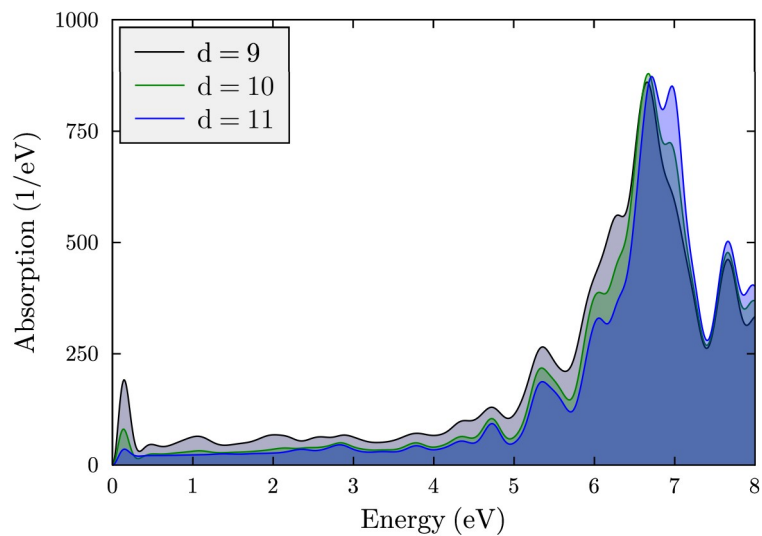

Evolution of the absorption spectra of the FCC cluster as a function of d values (in Å)

Figure S4

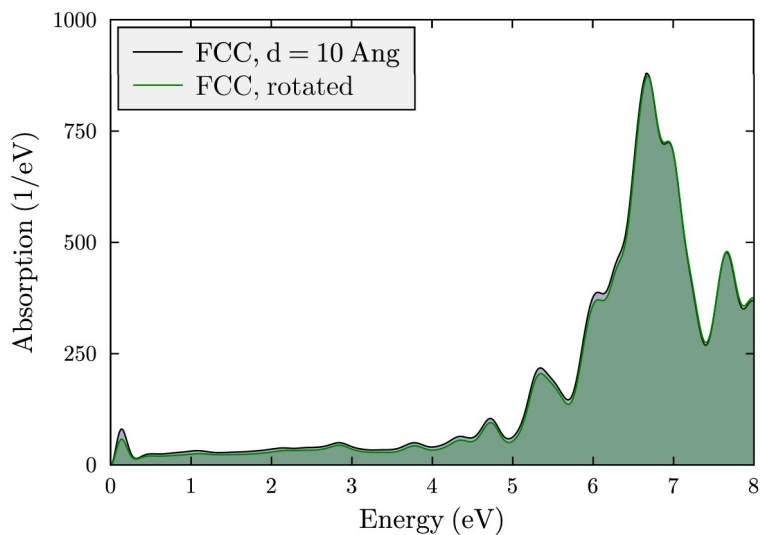

Comparison of the absorption spectra of non-rotated and rotated FCC cluster for d = 10 Å.

Figure S5

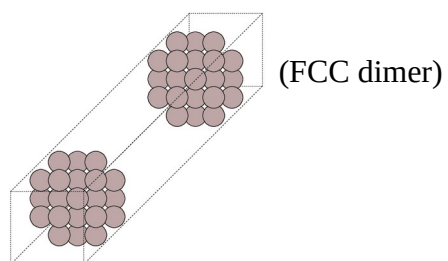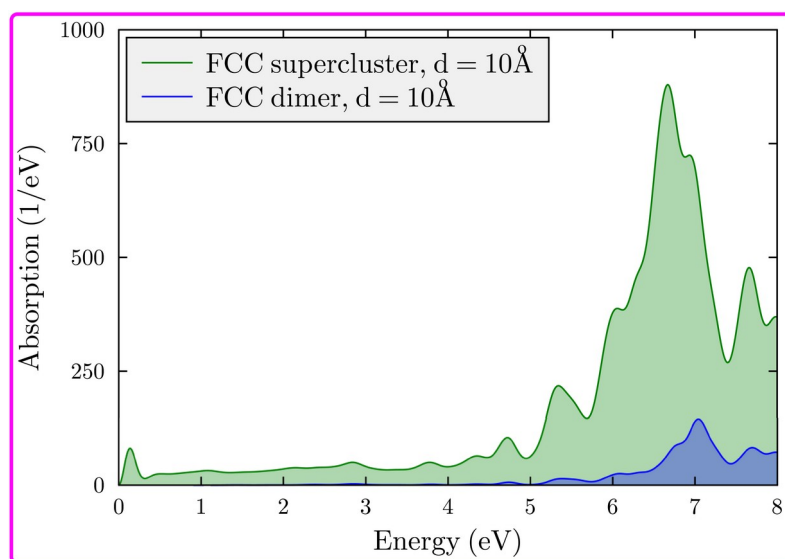

Comparing the absorption spectra of FCC supercluster ( $d = 10 \text{ \AA}$ ) and FCC dimer ( $d = 10 \text{ \AA}$ ).
